# High-fidelity base editor with no detectable genome-wide off-target effects

Erwei Zuo<sup>1,2,†,\*</sup>, Yidi Sun<sup>3,4,†</sup>, Tanglong Yuan<sup>1,†</sup>, Bingbing He<sup>2,†</sup>, Changyang Zhou<sup>2,†</sup>, Wenqin Ying<sup>2</sup>,  
Jing Liu<sup>1</sup>, Wu Wei<sup>4,5</sup>, Rong Zeng<sup>3,6</sup>, Yixue Li<sup>4,6,7,8,9,\*</sup>, Hui Yang<sup>2,\*</sup>,<sup>10</sup>

<sup>1</sup>Center for Animal Genomics, Agricultural Genome Institute at Shenzhen, Chinese Academy of Agricultural Sciences, Shenzhen 518124, China

<sup>2</sup>Institute of Neuroscience, State Key Laboratory of Neuroscience, Key Laboratory of Primate Neurobiology, CAS Center for Excellence in Brain Science and Intelligence Technology, Shanghai Research Center for Brain Science and Brain-Inspired Intelligence, Shanghai Institutes for Biological Sciences, Chinese Academy of Sciences, Shanghai 200031, China

<sup>3</sup>CAS Key Laboratory of Systems Biology, CAS Center for Excellence in Molecular Cell Science, Institute of Biochemistry and Cell Biology, Shanghai Institutes for Biological Sciences, Chinese Academy of Sciences, University of Chinese Academy of Sciences, Shanghai, 200031, China

<sup>4</sup>Bio-Med Big Data Center, Key Laboratory of Computational Biology, CAS-MPG Partner Institute for Computational Biology, Shanghai Institute of Nutrition and Health, Shanghai Institutes for Biological Sciences, University of Chinese Academy of Sciences, Chinese Academy of Sciences Shanghai, 200031, China

<sup>5</sup>Center for Biomedical Informatics, Shanghai Children's Hospital, Shanghai Jiao Tong University, Shanghai 200040, China

<sup>6</sup>Department of Life Sciences, Shanghai Tech University, 100 Haike Road, Shanghai, 200031, China

<sup>7</sup>School of Life Sciences and Biotechnology, Shanghai Jiao Tong University, Shanghai, 200240, China.

<sup>8</sup>Collaborative Innovation Center for Genetics and Development, Fudan University, Shanghai, China.

<sup>9</sup>Shanghai Center for Bioinformation Technology, Shanghai Academy of Science & Technology, Shanghai, China

<sup>10</sup>Lead contact

†These authors contributed equally to this work.

\*Corresponding authors. E-mail: [erweizuo@163.com](mailto:erweizuo@163.com), [yxli@sibs.ac.cn](mailto:yxli@sibs.ac.cn) or [huiyang@ion.ac.cn](mailto:huiyang@ion.ac.cn)

36

37 **Base editors hold promise for correcting pathogenic mutations, while substantial**  
38 **single nucleotide variations (SNVs) on both DNA and RNA were generated by**  
39 **cytosine base editors (CBEs). Here we examined possibilities to reduce off-target**  
40 **effects by engineering cytosine deaminases. By screening 24 CBEs harboring**  
41 **various rAPOBEC1 (BE3) or human APOBEC3A (BE3-hA3A) mutations on the**  
42 **ssDNA or RNA binding domain, we found 8 CBE variations could maintain high**  
43 **on-target editing efficiency. Using Genome-wide Off-target analysis by Two-cell**  
44 **embryo Injection (GOTI) method and RNA sequencing analysis, we found DNA**  
45 **off-target SNVs induced by BE3 could be completely eliminated in BE3<sup>R126E</sup> but**  
46 **the off-target RNA SNVs was only slightly reduced. By contrast, BE3-hA3A<sup>Y130F</sup>**  
47 **abolished the RNA off-target effects while could not reduce the DNA off-target**  
48 **effects. Notably, BE3<sup>R132E</sup>, BE3<sup>W90Y+R126E</sup> and BE3<sup>W90F+R126E</sup> achieved the**  
49 **elimination of off-target SNVs on both DNA and RNA, suggesting the feasibility**  
50 **of engineering base editors for high fidelity deaminases.**

51

52 Base editors have been widely applied to perform targeted base editing and hold great  
53 potential for correcting pathogenetic mutations<sup>1</sup>. However, previous studies have  
54 identified off-target DNA edits by cytosine base editors (CBEs)<sup>2, 3</sup>, the most widely  
55 used cytosine base editors with rat APOBEC1 (rAPOBEC1) enzyme<sup>4, 5</sup>. Recently,  
56 several groups reported that CBEs with rAPOBEC1 (BE3) or human APOBEC3A  
57 (BE3-hA3A) can cause extensive transcriptome-wide RNA off-target edits in human  
58 cells<sup>6-8</sup>. These off-target RNA SNVs could be substantially decreased by screening  
59 CBEs harboring various rAPOBEC1 or hA3A mutations, but the DNA off-target edits  
60 of these variants were unknown<sup>6-8</sup>.

61 The observation of unwanted DNA and RNA off-target effects both have important  
62 implications for research and therapeutic applications of these technologies. Previous  
63 studies only examined the DNA (Zuo et al., 2019) or RNA off-target effects (Zhou et  
64 al., 2019) of base editors, here we analyzed both the DNA and RNA off-target effects  
65 of multiple engineered CBE variants by Genome-wide Off-target analysis by Two-cell  
66 embryo Injection (GOTI) and RNA-Seq analysis. We found that some variants could  
67 eliminate the DNA off-target activity while sustained RNA off-target effects.  
68 Conversely, some variant abolished the RNA off-target effects while maintained the  
69 DNA off-targets. Importantly, we successfully obtained three variants with the  
70 elimination of both DNA and RNA off-target effects.

71

72 We introduced various point mutations into rAPOBEC1 affecting the DNA<sup>9-14</sup> or  
73 RNA<sup>14, 15</sup> editing activity suggested by previous studies (Fig. 1a). The variants  
74 included deletions and mutations at the L-enriched 5' or 3' terminals of APOBEC1  
75 (Del32, R33A, K34A, Del34, Del77, Del116, Del169, Del182, P190A and P191A),  
76 point mutations on the putative catalytic active site of APOBEC1 (H61A, H61R,  
77 V62A, E63A, E63Q, C93S, C96S). Based on the structure of human APOBEC3G<sup>10</sup>,

78 <sup>11</sup>, R126 is predicted to have interaction with the phosphate backbone of ssDNA  
79 (corresponding to R320 in APOBEC3G) (Fig. 1b, c). Compared with other mutations,  
80 R126E maintained on-target editing activity<sup>9</sup>. R128 and R132<sup>9</sup> are near to R126 and  
81 could also affect the accessibility of ssDNA, so we also introduced mutations of  
82 R128E and R132E (Fig. 1a-c). We also examined the effect of combination of point  
83 mutations in the domain responsible for the hydrophobicity of the active site on  
84 APOBEC1 (W90A, W90F, W90Y), which was reported to narrow the width of base-  
85 editing window<sup>9, 10</sup>.

86

87 We transfected HEK293T cells with plasmids encoding BE3 base editors  
88 harboring various mutations and evaluated their effects on both on-target efficiency  
89 and off-target rate. We tested the on-target activity of these variants on 10 genomic  
90 loci. Totally, by screening 23 engineered BE3 variants, we found 7 variants (R33A,  
91 K34A, V62A, W90F+R126E, W90Y+R126E, R126E and R132E) remained the on-  
92 target efficiency, and 4 of them (W90F+R126E, W90Y+R126E, R126E, R132E)  
93 showed no increase of indel rates (Fig. 1d and Supplementary Table 1). Besides, all of  
94 them showed no significantly difference on the editing window widths  
95 (Supplementary Fig. 1). Alternatively, we also tested one variant on hA3A (BE3-  
96 hA3A<sup>Y130F</sup>), reported to have high DNA on-target efficiency<sup>16, 17</sup>, and found it  
97 remained high on-target editing activities (Fig. 1d).

98

99 We next performed GOT1 to evaluate the DNA off-target edits of the variants  
100 with high DNA on-target efficiency (BE3<sup>R126E</sup>, BE3<sup>R132E</sup>, BE3<sup>W90Y+R126E</sup>,  
101 BE3<sup>W90F+R126E</sup> and BE3-hA3A<sup>Y130F</sup>) (Supplementary Table 2). The embryonic  
102 development was not affected by these variants injection except for BE3-hA3A  
103 (Supplementary Fig. 2). The on-target efficiency of these variants were confirmed by  
104 whole-genome sequencing (Fig. 2a). Notably, the number of DNA off-target SNVs in  
105 the embryos treated with BE3<sup>R126E</sup>, BE3<sup>R132E</sup>, BE3<sup>W90Y+R126E</sup> or BE3<sup>W90F+R126E</sup> was  
106 significantly reduced from 283 +/- 32 in wild-type BE3-treated embryos to 28 +/- 6  
107 for BE3<sup>R126E</sup>, 43 +/- 11 for BE3<sup>R132E</sup>, 12 +/- 3 for BE3<sup>W90Y+R126E</sup> and 39 +/- 27 for  
108 BE3<sup>W90F+R126E</sup>, similar to that found in non-edited control embryos (14 SNVs on  
109 average) and close to that of spontaneous mutation (Fig. 2b, Supplementary Fig. 3 and  
110 Supplementary Table 3). Besides, we observed no mutation bias and no SNVs that  
111 overlapped with the predicted off-target sites (Fig. 2c and Supplementary Fig. 4),  
112 suggesting the absence of DNA off-target SNVs induced by these variants. However,  
113 the BE3-hA3A<sup>Y130F</sup> variant still generated substantial DNA off-target SNVs (409 +/-  
114 86) (Fig. 2b and 2c).

115

116 Moreover, we also evaluated the potential off-target effects on transcriptome of  
117 these variants. We found evident decrease of RNA off-target SNVs in BE3<sup>R126E</sup>, but  
118 the number was still significantly higher than that of the control group transfected  
119 with GFP (Fig. 3a and 3b). Intriguingly, two variants BE3<sup>R132E</sup> and BE3<sup>W90F+R126E</sup>  
120 (also know as BE3-FE1)<sup>9</sup> showed complete elimination of the RNA off-target edits.  
121 Combined with our previous results that BE3<sup>W90Y+R126E</sup> (also know as BE3-YE1)<sup>9</sup>

122 could completely eliminated the RNA off-target edits (Fig. 3a and 3b), we here  
123 obtained three variants, BE3<sup>R132E</sup>, BE3<sup>W90Y+R126E</sup> and BE3<sup>W90F+R126E</sup>, with complete  
124 abolish of both DNA and RNA off-target effects.

125

126 Considering that GOT1 was developed to examine the sgRNA-independent off-  
127 target effects, we also examined the sgRNA-dependent off-target sites as previous  
128 studies<sup>18</sup>. We found no increase of the number of these sgRNA-dependent off-targets  
129 in all the variants (Supplementary Fig. 5).

130

131 In summary, by screening dozens of mutations on rAPOBEC1 or hA3A from  
132 multiple researches before, we found three variants with complete abolish of both  
133 DNA and RNA off-targets with no compromise for on-target activity. Although  
134 BE3<sup>R132E</sup>, BE3<sup>W90Y+R126E</sup> and BE3<sup>W90F+R126E</sup> have been reported to remain editing  
135 efficiencies as BE3<sup>9</sup>, off-target evaluation is necessary for their clinical application. In  
136 addition, we found that BE3<sup>R126E</sup> could eliminate the DNA off-target effects but not  
137 the RNA off-targets, while BE3-hA3A<sup>Y130F</sup> only reduced the RNA off-target effects,  
138 indicating that the elimination of DNA off-target effects was not eligible for the  
139 minimization of RNA off-target effects, and vice versa. Engineered variants with high  
140 fidelity on both DNA and RNA provide a safe tool for gene editing. Notably, the study  
141 described here demonstrates that the DNA and RNA off-target effects of BE3 could be  
142 simultaneously eliminated by engineering APOBEC1 with mutations on the putative  
143 ssDNA binding domain and hydrophobic domain but not on catalytic domain.  
144 Therefore, our work illustrates how the off-target effects can be defined and  
145 minimized for research and therapeutic applications (Fig. 3c). This approach for  
146 fusion protein optimization could be generalized in other synthetic tools such as  
147 CRISPR/Cas9 derivatives (Supplementary Fig. 6).

148

149

## 150 **Acknowledgments**

151 We thank FACS facility HW, LQ, SQ in ION and MZ in IPS, LY in Big Data Platform  
152 (SIBS,CAS). These work were supported by R&D Program of China  
153 (2018YFC2000100 and 2017YFC1001302), CAS Strategic Priority Research  
154 Program (XDB32060000), National Natural Science Foundation of China (31871502,  
155 31522037, 31822035), Shanghai Municipal Science and Technology Major Project  
156 (2018SHZDZX05), Shanghai City Committee of science and technology project  
157 (18411953700, 18JC1410100), National Science and Technology Major Project  
158 (2015ZX10004801-005), National Key Research and Development Program of China  
159 (2017YFA0505500, 2016YFC0901704) and the Agricultural Science and Technology  
160 Innovation Program.

161

## 162 **Author contributions**

163 EZ designed and performed experiments. YS, WW, RZ and LY performed data  
164 analysis. TY, BH and JL performed PCR analysis. WY performed mouse embryo  
165 transfer. HY and YL supervised the project and designed experiments. YS and HY

166 wrote the paper.

167

### 168 **Competing financial interests**

169 The authors declare no competing financial interests.

170

### 171 **Data and materials availability**

172 All the sequencing data were deposited in NCBI Sequence Read Archive (SRA) under  
173 project accession PRJNA527003.

174

### 175 **REFERENCES**

- 176 1. Rees, H.A. & Liu, D.R. Base editing: precision chemistry on the genome and transcriptome  
177 of living cells. *Nat Rev Genet* (2018).
- 178 2. Zuo, E. et al. Cytosine base editor generates substantial off-target single nucleotide  
179 variants in mouse embryos. *Science*, published online (2019).
- 180 3. Jin, S. et al. Cytosine, but not adenine, base editors induce genome-wide off-target  
181 mutations in rice. *Science*, published online (2019).
- 182 4. Komor, A.C., Kim, Y.B., Packer, M.S., Zuris, J.A. & Liu, D.R. Programmable editing of a target  
183 base in genomic DNA without double-stranded DNA cleavage. *Nature* **533**, 420-+ (2016).
- 184 5. Rees, H.A. & Liu, D.R. Base editing: precision chemistry on the genome and transcriptome  
185 of living cells. *Nat Rev Genet* **19**, 770-788 (2018).
- 186 6. Grunewald, J. et al. Transcriptome-wide off-target RNA editing induced by CRISPR-  
187 guided DNA base editors. *Nature* **569**, 433-437 (2019).
- 188 7. Grünwald, J. et al. CRISPR adenine and cytosine base editors with reduced RNA off-  
189 target activities. 631721 (2019).
- 190 8. Zhou, C. et al. Off-target RNA mutation induced by DNA base editing and its elimination  
191 by mutagenesis. *Nature* (2019).
- 192 9. Kim, Y.B. et al. Increasing the genome-targeting scope and precision of base editing with  
193 engineered Cas9-cytidine deaminase fusions. *Nat Biotechnol* **35**, 371-376 (2017).
- 194 10. Holden, L.G. et al. Crystal structure of the anti-viral APOBEC3G catalytic domain and  
195 functional implications. *Nature* **456**, 121-124 (2008).
- 196 11. Chen, K.M. et al. Structure of the DNA deaminase domain of the HIV-1 restriction factor  
197 APOBEC3G. *Nature* **452**, 116-119 (2008).
- 198 12. Petersen-Mahrt, S.K. & Neuberger, M.S. In vitro deamination of cytosine to uracil in  
199 single-stranded DNA by apolipoprotein B editing complex catalytic subunit 1 (APOBEC1).  
200 *J Biol Chem* **278**, 19583-19586 (2003).
- 201 13. Harris, R.S., Petersen-Mahrt, S.K. & Neuberger, M.S. RNA editing enzyme APOBEC1 and  
202 some of its homologs can act as DNA mutators. *Mol Cell* **10**, 1247-1253 (2002).
- 203 14. Teng, B.B. et al. Mutational analysis of apolipoprotein B mRNA editing enzyme (APOBEC1).  
204 structure-function relationships of RNA editing and dimerization. *J Lipid Res* **40**, 623-635  
205 (1999).
- 206 15. Teng, B., Burant, C.F. & Davidson, N.O. Molecular cloning of an apolipoprotein B  
207 messenger RNA editing protein. *Science* **260**, 1816-1819 (1993).
- 208 16. Wang, X. et al. Efficient base editing in methylated regions with a human APOBEC3A-  
209 Cas9 fusion. *Nat Biotechnol* **36**, 946-949 (2018).

- 210 17. Gehrke, J.M. et al. An APOBEC3A-Cas9 base editor with minimized bystander and off-  
211 target activities. *Nat Biotechnol* **36**, 977-982 (2018).
- 212 18. Gaudelli, N.M. et al. Programmable base editing of A\*T to G\*C in genomic DNA without  
213 DNA cleavage. *Nature* **551**, 464-471 (2017).
- 214



215 **Figure legends**

216 **Figure 1. On-target efficiency of engineered CBEs.** **a** The predicted structure of  
217 APOBEC1 with various rAPOBEC1 mutations. Mutated residues were highlighted  
218 and marked on the structure. **b** The sequence alignment between APOBEC3G and  
219 APOBEC1. Amino acid, identical residues; +, conservative substitutions. Green  
220 triangle represents residues in the hydrophobic active domain of APOBEC3G, and  
221 yellow stars indicate residues on the ssDNA binding domain. **c** The crystal structure  
222 of APOBEC3G. **d** The on-target efficiency and indel frequencies of different versions  
223 of engineered CBEs. Purple triangles indicate variants selected for the off-target  
224 evaluation.  $n = 3$  biological replicates for each group.

225

226

227 **Figure 2. On-target and off-target evaluation of engineered CBEs by GOT1.** **a**  
228 On-target efficiency of BE3 and CBE variants from WGS data. **b** The comparison of  
229 the total number of detected off-target SNVs.  $n = 2$  for Cre,  $n = 6$  for BE3,  $n = 10$  for  
230 BE3<sup>R126E</sup>,  $n = 2$  for BE3<sup>R132E</sup>,  $n = 5$  for BE3<sup>W90Y+R126E</sup>,  $n = 2$  for BE3<sup>W90F+R126E</sup> and  
231  $n = 3$  for BE3-hA3A<sup>Y130F</sup> groups.  $P$  value was calculated by two-sided Student's t-test.  
232 \* $P < 0.05$ , \*\* $P < 0.01$ , \*\*\* $P < 0.001$ . **c** Proportion of C>T and G>A mutations for Cre,  
233 BE3, and CBE variants-treated groups.

234

235 **Figure 3. RNA off -target evaluation of engineered CBEs.** **a** The comparison of the  
236 total number of detected RNA off-target SNVs.  $n = 6$  for GFP,  $n = 8$  for BE3,  $n = 6$   
237 for BE3<sup>R126E</sup>,  $n = 3$  for BE3<sup>R132E</sup>,  $n = 2$  for BE3<sup>W90Y+R126E</sup>,  $n = 3$  for BE3<sup>W90F+R126E</sup>,  $n$   
238  $= 3$  for BE3 (hA3A) and  $n = 3$  for BE3-hA3A<sup>Y130F</sup> groups.  $P$  value was calculated by  
239 two-sided Student's t-test. \* $P < 0.05$ , \*\* $P < 0.01$ , \*\*\* $P < 0.001$ . **b** Proportion of C>U  
240 and G>A mutations for GFP, BE3, and BE3 variants-treated groups. **c** Model of CBE  
241 optimization. The nickase Cas9 (nCas9) of engineered CBE loses one nuclease  
242 activity of Cas9 while remains the DNA binding ability. In contrast to nCas9, mutant  
243 APOBEC1 of engineered CBE loses the binding ability of ssDNA and RNA but  
244 remains the deaminase activity. AD, active domain; BD, binding domain; APOBEC1,  
245 rAPOBEC1; UGI, uracil DNA glycosylase inhibitor.

246

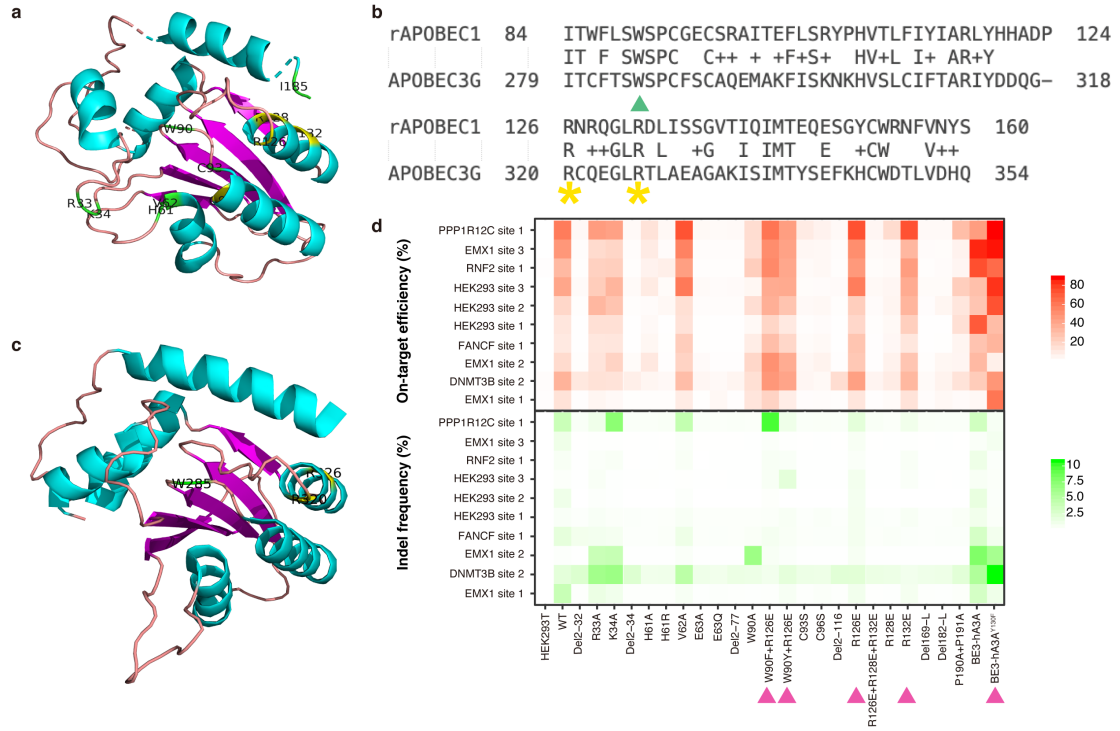

247



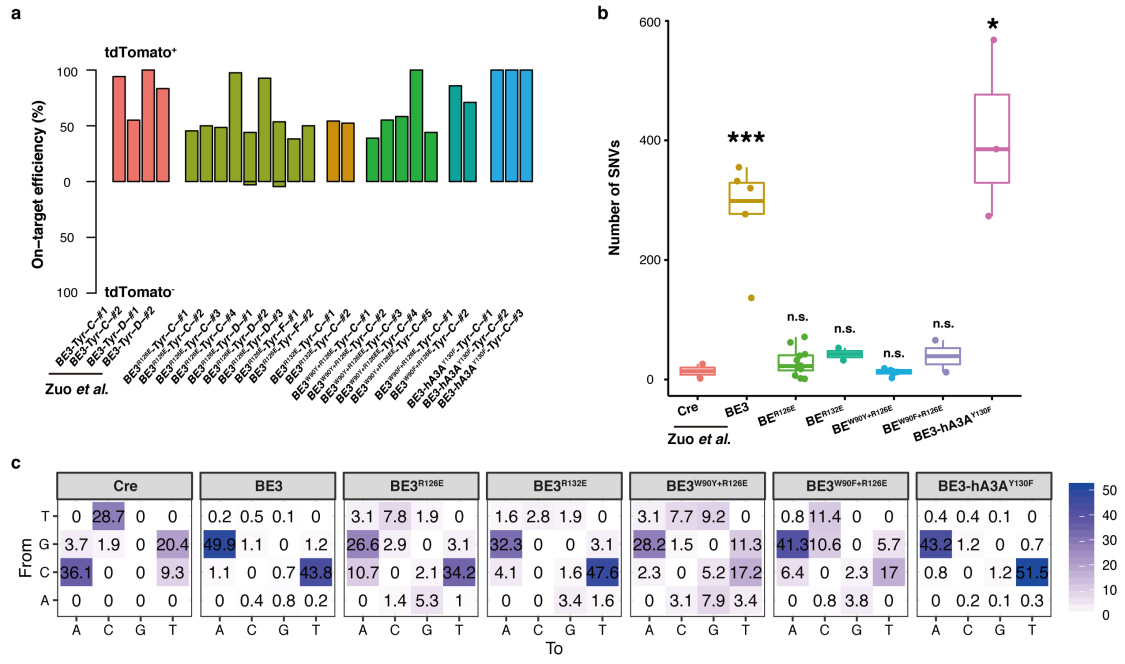

248

249

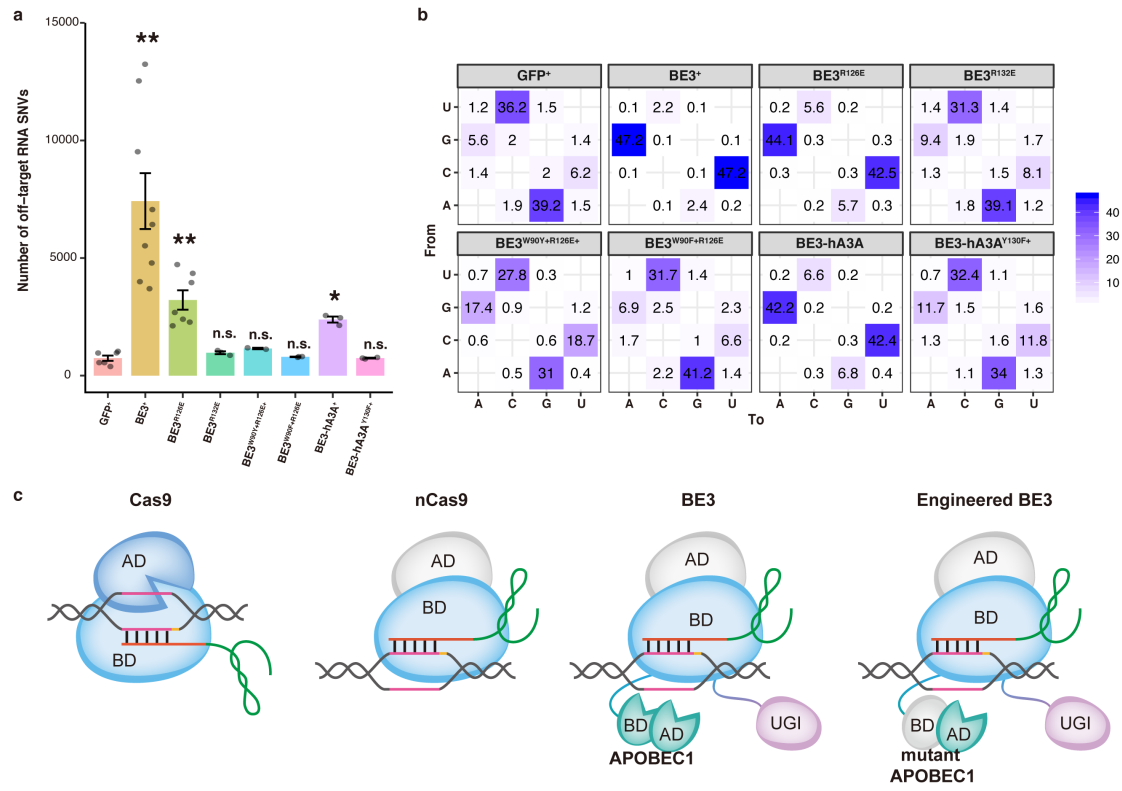

250

# Supplementary Information

## High-fidelity base editor with no detectable genome-wide off-target effects

Erwei Zuo<sup>1,2,†,\*</sup>, Yidi Sun<sup>3,4,†</sup>, Tanglong Yuan<sup>1,†</sup>, Bingbing He<sup>2,†</sup>, Changyang Zhou<sup>2,†</sup>, Wenqin Ying<sup>2</sup>, Jing Liu<sup>1</sup>, Wu Wei<sup>4,5</sup>, Rong Zeng<sup>3,6</sup>, Yixue Li<sup>4,6,7,8,9,\*</sup>, Hui Yang<sup>2,\*</sup>,<sup>10</sup>

### **This PDF file includes:**

Materials and Methods  
Supplementary Figures 1-6  
Supplementary Tables 1-5  
Additional Table S3  
References

## Materials and Methods

### Animal care

Heterozygous Ai9 (full name B6.Cg-Gt (ROSA) 26Sortm9 (CAG-td-Tomato) Hze/J; JAX strain 007909) male mice and female C57BL/6 mice (4 weeks old) were mated for embryo collection. ICR females were used for recipients. The animals usage and care complied with the guideline of the Biomedical Research Ethics Committee of Shanghai Institutes for Biological Science, Chinese Academy of Sciences.

### Generation of mutant base editor mRNA and sgRNA

T7 promoter was added to base editor coding region by PCR amplification of plasmid, using primer base editor F and R. T7-base editor PCR product was purified and used as the template for *in vitro* transcription (IVT) using mMESSAGE mMACHINE T7 ULTRA kit (Life Technologies). T7 promoter was added to sgRNA template by PCR amplification of px330. The T7-sgRNA PCR product was purified and used as the template for IVT using MEGA shortscript T7 kit (Life Technologies). T7 promoter was added to Cre template by PCR amplification. T7-Cre PCR product was purified and used as the template for *in vitro* transcription (IVT) using mMESSAGE mMACHINE T7 ULTRA kit (Life Technologies). Cas9 mRNA, Cre mRNA and sgRNAs were purified using MEGA clear kit (Life Technologies) and eluted in RNase-free water.

sgRNA sequences

| Locus              | Sequence (5'-3')        |
|--------------------|-------------------------|
| Tyr-C <sup>1</sup> | GACCTCAGTTCCCCTTCAAAGGG |
| Tyr-D <sup>1</sup> | CTGTGCCAAGGCAGAAACCCTGG |
| Tyr-F              | TGCGGCCAGCTTTCAGGCAGAGG |

### Primers

| Name              | Sequence (5'-3')                                                |
|-------------------|-----------------------------------------------------------------|
| base editor IVT F | TCCGCGGCCGCTAATACGACT                                           |
| base editor IVT R | TGGTTCCTTCCGCCTCAGAAGCC                                         |
| Cre IVT F         | TAATACGACTCACTATAGGGAGACAGATCACCTTTC<br>CTATCAACC               |
| Cre IVT R         | TCGGTATTTCCAGCACACTGGA                                          |
| Tyr-C IVT F       | TAATACGACTCACTATAGGGGACCTCAGTTCCCCTT<br>CAAAGTTTTAGAGCTAGAAATAG |
| Tyr-D IVT F       | TAATACGACTCACTATAGGGCTGTGCCAAGGCAGA<br>AACCCGTTTTAGAGCTAGAAATAG |
| sgRNA IVT R       | AAAAGCACCGACTCGGTGCC                                            |

### 2-cell Embryo Injection, Embryo Culturing, and Embryo Transplantation

Super ovulated C57BL/6 females (4 weeks old) were mated to heterozygous Ai9 (full name B6.Cg-Gt(ROSA)26Sortm9(CAG-td-Tomato)Hze/J; JAX strain 007909) males, and fertilized embryos were collected from oviducts 23 h post hCG injection. For 2-cell editing, the mixture of BE3 mRNA (10 or 50 ng/ $\mu$ l) or BE3<sup>R126E</sup> mRNA (50 ng/ $\mu$ l), sgRNA (50 ng/ $\mu$ l) and Cre mRNA (2 ng/ $\mu$ l) was injected into the cytoplasm of one blastomere of 2-cell embryo 48 h post hCG injection in a droplet of M2 medium containing 5  $\mu$ g/ml cytochalasin B (CB) using a FemtoJet microinjector (Eppendorf) with constant flow settings. The injected embryos cultured in KSOM medium with amino acids at 37 °C under 5% CO<sub>2</sub> in air for 2 hours and then transferred into oviducts of pseudopregnant ICR females at 0.5 dpc.

### Cloning

Site-directed mutagenesis of BE3 was done using NEBuilder HiFi DNA Assembly Master Mix (New England BioLabs). Briefly, a primer with an overhang containing the desired point mutation was used to amplify the appropriate vector plasmid by PCR. pCMV-BE3 variants-polyA-pCMV-mCherry-polyA was generated through NEBuilder HiFi DNA Assembly, by combining a PCR-amplified pCMV-mCherry-poly A with a digested pCMV-BE3 variants backbone. pCMV-EGFP-polyA-U6-sgRNA were generated through NEBuilder HiFi DNA Assembly, by combining a PCR-amplified U6-sgRNA with a digested pCMV-EGFP-poly A backbone.

### Cell culture, transfections and FACS

HEK293T cells were maintained in Dulbecco's modified eagle medium (DMEM) supplemented with 10% fetal bovine serum (FBS) in a 37°C humidified incubator with 5% CO<sub>2</sub>. pCMV-BE3 (WT/BE3 variants)-polyA-pCMV-mCherry-polyA and pCMV-EGFP-polyA-U6-sgRNA expression plasmids were co-transfected using Lipofectamine 3000 (ThermoFisher Scientific) according to the manufacturer's protocol. 72 hr post transfection, cells were washed with phosphate buffered saline (PBS) and trypsinized using 0.05% trypsin-EDTA. Cell suspension was filtered through a 40- $\mu$ m cell strainer, and EGFP/mCherry positive cells were isolated by FACS.

### FACS

To isolate mouse embryonic cells, the prepared tissues were dissociated enzymatically in an incubation solution of 5 mL Trypsin-EDTA (0.05%) at 37°C for 30min. The digestion was stopped by adding 5 ml of DMEM medium with 10% Fetal Bovine Serum (FBS). Fetal tissues were then homogenized by passing 30-40 times through a 1ml pipette tips. The cell suspension was centrifuged for 6 min (800 rpm), and the pellet was resuspended in DMEM medium with 10% FBS. Finally, the cell suspension was filtered through a 40- $\mu$ m cell strainer, and tdtomato<sup>+</sup>/tdtomato<sup>-</sup> cells were isolated by FACS. Samples were found to be >95% pure when assessed with a second round of flow cytometry and fluorescence microscopy analysis.

### Whole genome sequencing and data analysis

DNeasy blood and tissue kit (catalog number 69504, Qiagen) was used to extract genomic DNA from cells following the manufacturer's instructions. Whole genome sequencing was performed at mean coverages of 50x by Illumina HiSeq X Ten. BWA (v0.7.12) was used to map qualified sequencing reads to the reference genome (mm10). The mapped BAM files were then sorted and marked using Picard tools (v2.3.0). To identify the genome wide *de novo* SNVs with high confidence, we conducted single nucleotide variation calling on three algorithms, Mutect2 (v3.5), Lofreq (v2.1.2) and Strelka (v2.7.1), separately<sup>2-4</sup>. In parallel, Mutect2 (v3.5), Scalpel (v0.5.3) and Strelka (v2.7.1) were run individually for the detection of whole genome *de novo* indels<sup>2,4,5</sup>. The overlap of three algorithms of SNVs or indels were considered as the true variants. All the sequencing data were deposited in NCBI Sequence Read Archive (SRA) under project accession PRJNA527003.

Potential off-targets of targeted sites were predicted using two previous reported algorithms, Cas-OFFinder (<http://www.rgenome.net/cas-offinder/>) and CRISPOR (<http://crispor.tefor.net/>) with all possible mismatches<sup>6,7</sup>. The SNVs and indels were annotated with annovar (version 2016-02-01) using RefSeq database<sup>8</sup>.

### Structure prediction

Amino acid sequences of rat APOBEC1 and human APOBEC3G were retrieved from UniProt (<https://www.uniprot.org/>) and sequence alignment was performed with NCBI blastp ([https://blast.ncbi.nlm.nih.gov/Blast.cgi?PROGRAM=blastp&PAGE\\_TYPE=BlastSearch&LINK\\_LOC=blasthome](https://blast.ncbi.nlm.nih.gov/Blast.cgi?PROGRAM=blastp&PAGE_TYPE=BlastSearch&LINK_LOC=blasthome)). The structure of rAPOBEC1 was predicted by protein structure prediction server, (PS)<sup>2,9,10</sup> according to the consensus sequence and secondary structure information for proteins with known structures. The crystal structure of APOBEC3G was downloaded from PDB (<http://www.rcsb.org/3d-view/3IQS>) and presented using PyMOL (v2.3.2).

### Statistical analysis

R version 3.5.1 (<http://www.R-project.org/>) was used to conduct all the statistical analyses in this work. All tests conducted were two-sided, and the significant difference was considered at  $P < 0.05$ .

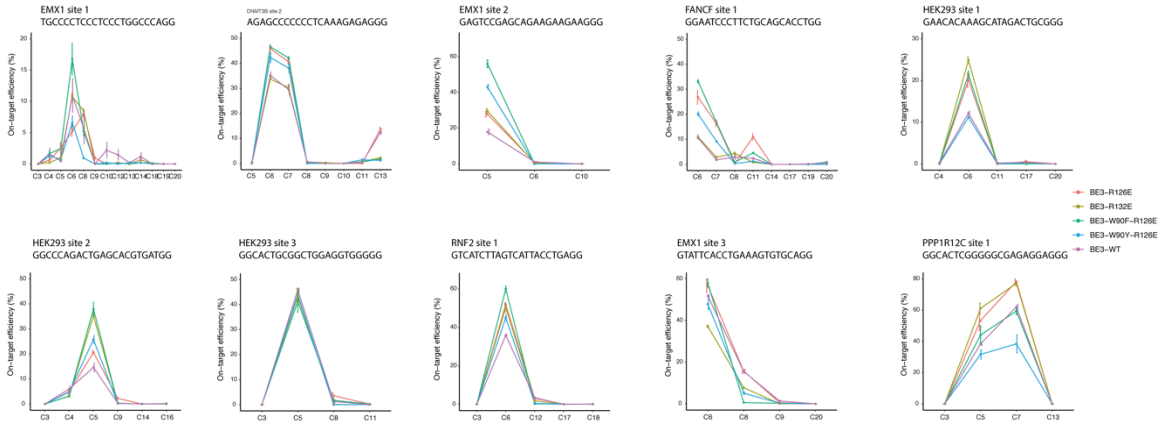

**Supplementary Figure 1** The editing window of the BE3 and BE3 variants in different target sites.  $n = 3$  biological replicates for each point.



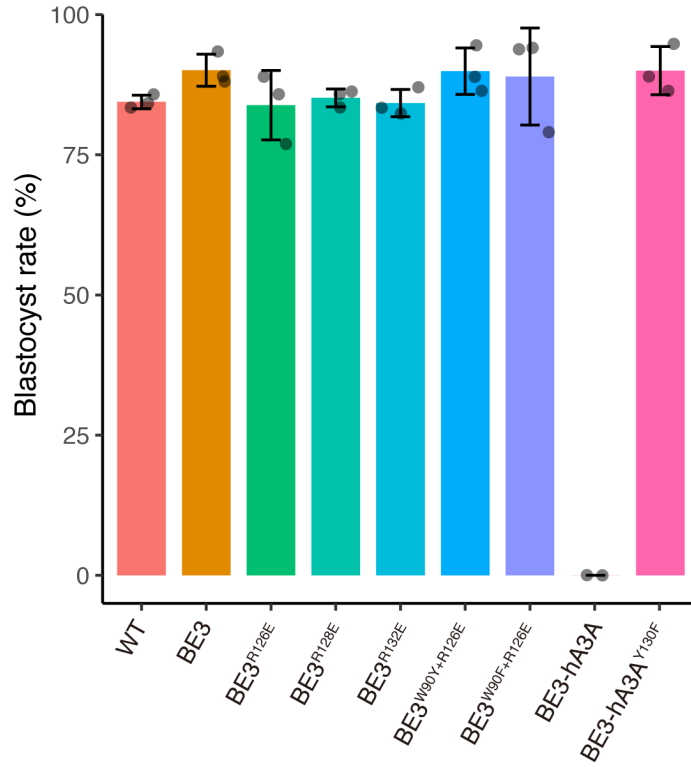

**Supplementary Figure 2** The embryonic development rates for BE3 and BE3 variants. *n* = 3 biological replicates for each group.

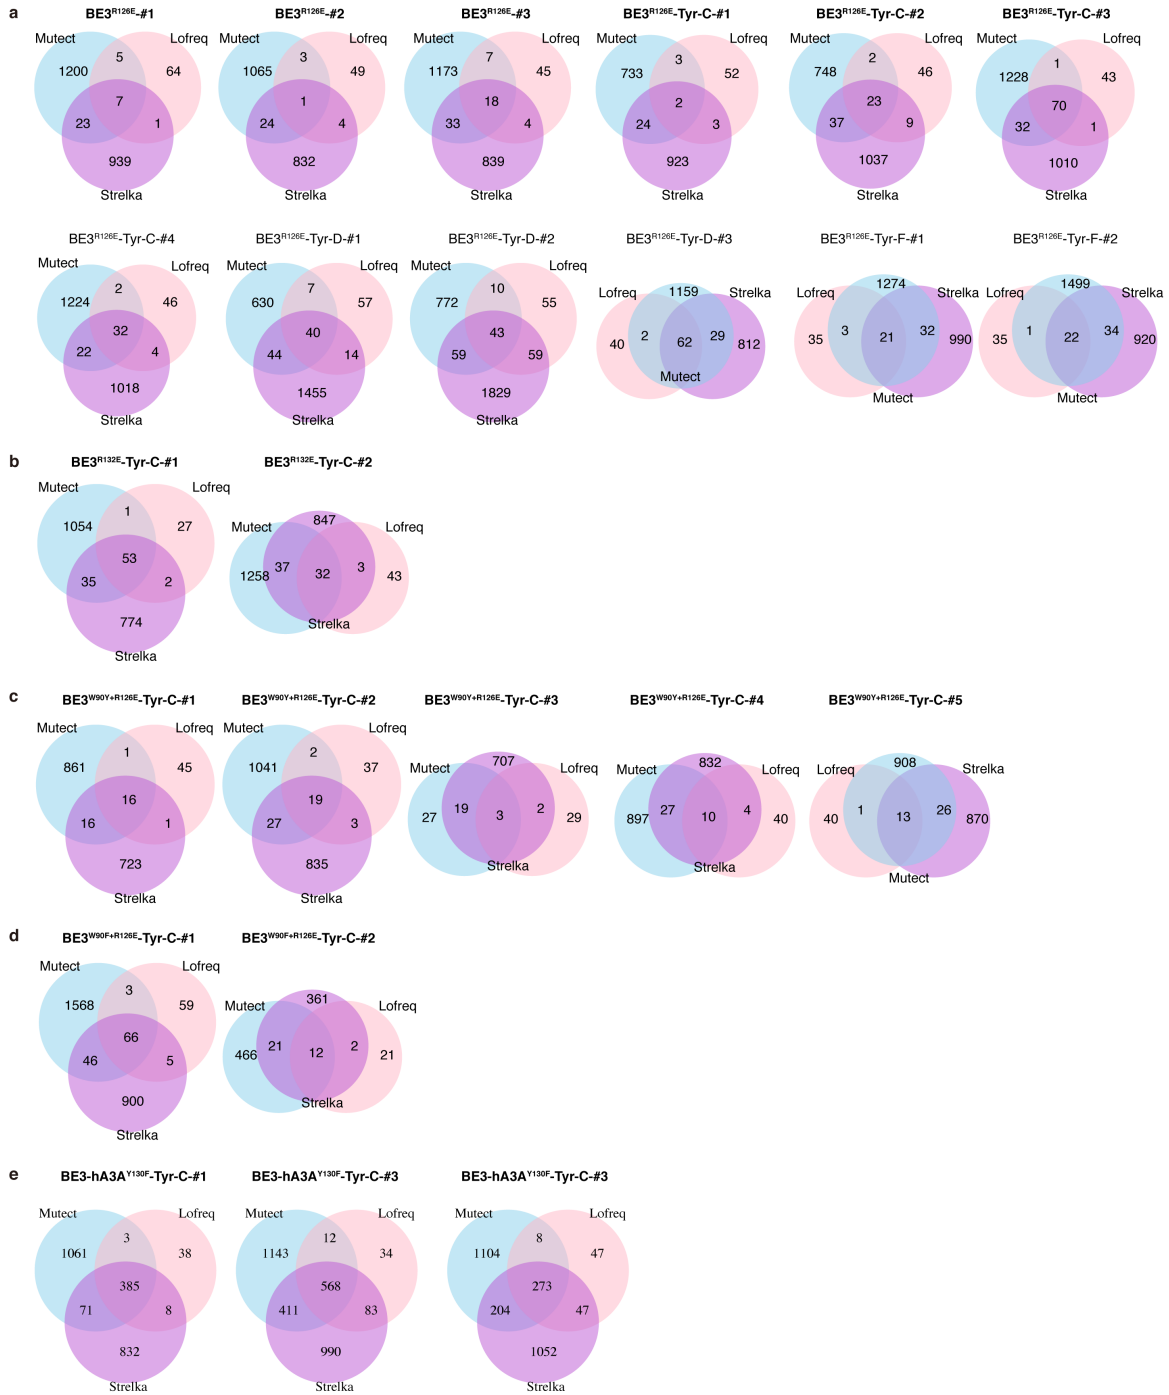

**Supplementary Figure 3 Venn diagrams of SNVs detected in each embryo by WGS data using the indicated software tools. a** SNVs identified in BE3<sup>R126E</sup>-treated embryos. **b** SNVs identified in BE3<sup>R132E</sup>-treated embryos. **c** SNVs identified in BE3<sup>W90Y+R126E</sup>-treated embryos. **d** SNVs identified in BE3<sup>W90F+R126E</sup>-treated embryos. **e** SNVs identified in BE3-hA3A<sup>Y130F</sup>-treated embryos.

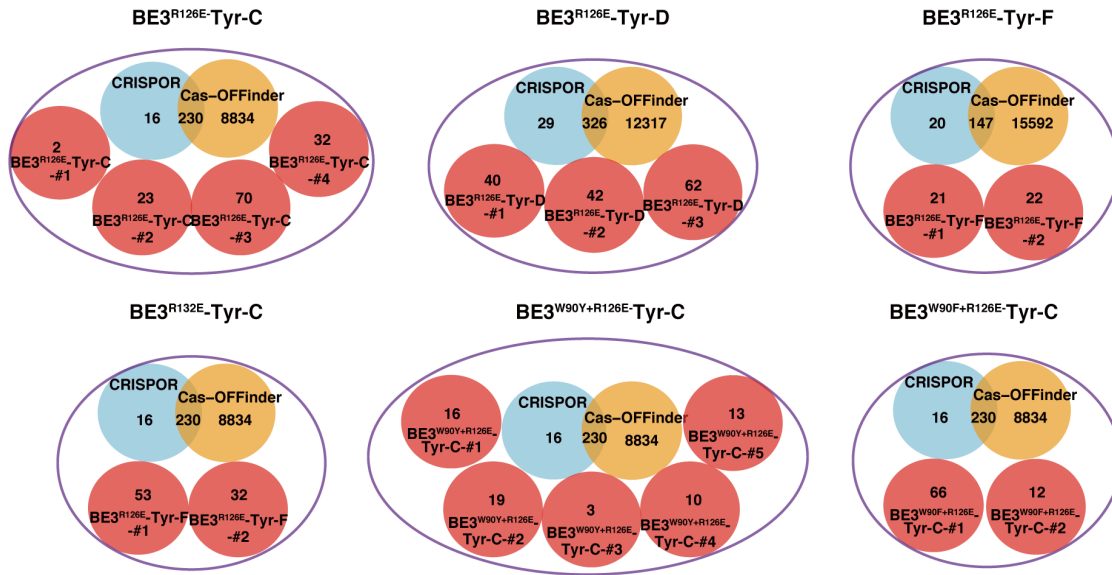

**Supplementary Figure 4 The overlap among SNVs detected from our analysis with predicted off-targets sites by Cas-OFFinder and CRISPOR.**

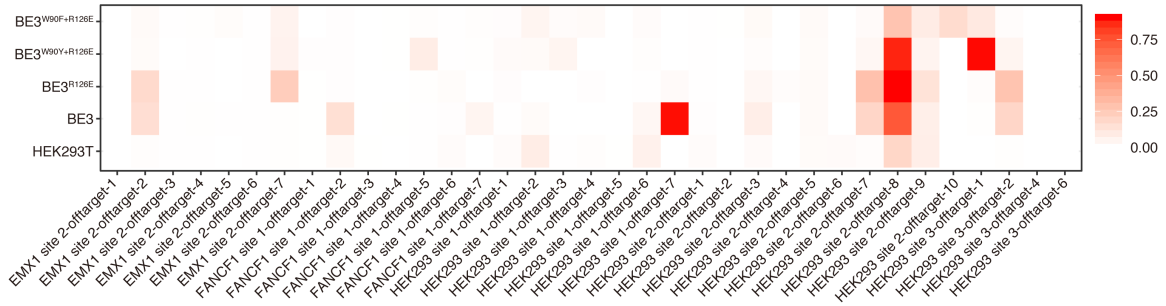

**Supplementary Figure 5 Activities of BE3 and BE3 variants at the indicated off-target sites.** HEK293T cells were transfected with plasmids expressing BE3, BE3<sup>R126E</sup>, BE3<sup>W90Y+R126E</sup> or BE3<sup>W90F+R126E</sup> and sgRNAs matching the indicated on-target sequence using Lipofectamine 3000. Three days after transfection, genomic DNA was extracted, amplified by PCR, and analyzed by high-throughput DNA sequencing at the on-target loci, plus the top ten known Cas9 off-target loci for these sgRNAs, as previously determined using the GUIDE-seq method<sup>11, 12</sup> and ChIP-seq method<sup>13</sup>. Sequences of the on-target and off-target protospacers and primers were shown in Table S5. Each cell represents the percentage of total sequencing reads with C to T conversion.  $n = 3$  biological replicates for each group.

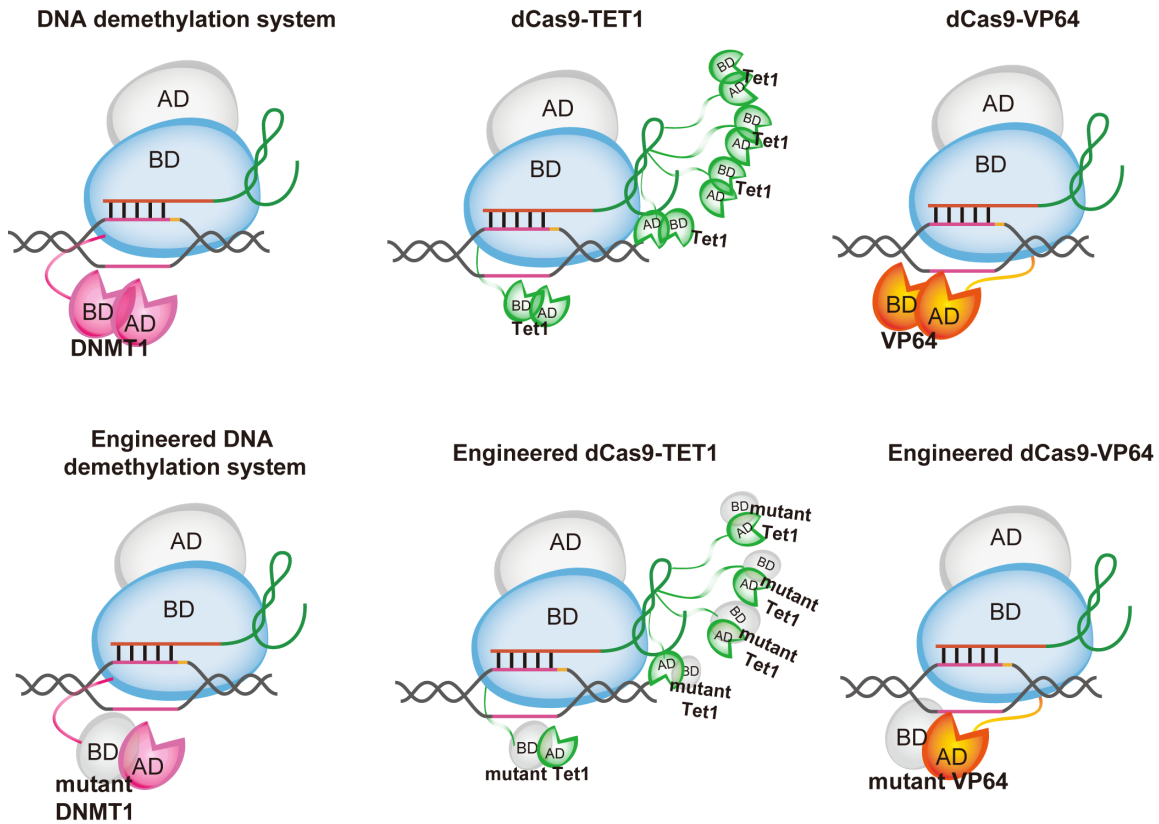

**Supplementary Figure 6 The generalization of optimization method for other CRISPR/Cas9 derivatives.** AD, active domain; BD, binding domain; Tet1, Ten-Eleven Translocation dioxygenase 1.

**Supplementary Table 1. P values of the on-target efficiency and indel rates between CBE variants and BE3.**

| <b>Mutant</b>            | <b>On-target efficiency</b> | <b>Indel frequency</b> |
|--------------------------|-----------------------------|------------------------|
| <b>Del2-32</b>           | 0.001                       | 0.046                  |
| <b>R33A</b>              | 0.191                       | 0.957                  |
| <b>K34A</b>              | 0.257                       | 0.605                  |
| <b>R33A+K34A</b>         | 0.748                       | 0.020                  |
| <b>Del2-34</b>           | 0.001                       | 0.032                  |
| <b>H61A</b>              | 0.002                       | 0.014                  |
| <b>H61R</b>              | 0.001                       | 0.015                  |
| <b>V62A</b>              | 0.517                       | 0.724                  |
| <b>E63A</b>              | 0.001                       | 0.015                  |
| <b>E63Q</b>              | 0.001                       | 0.014                  |
| <b>Del2-77</b>           | 0.001                       | 0.017                  |
| <b>W90A</b>              | 0.019                       | 0.411                  |
| <b>W90F+R126E</b>        | 0.095                       | 0.893                  |
| <b>W90Y+R126E</b>        | 0.717                       | 0.126                  |
| <b>C93S</b>              | 0.001                       | 0.016                  |
| <b>C96S</b>              | 0.001                       | 0.018                  |
| <b>Del2-116</b>          | 0.001                       | 0.026                  |
| <b>R126E</b>             | 0.270                       | 0.282                  |
| <b>R126E+R132E</b>       | 0.430                       | 0.027                  |
| <b>R126E+R128E+R132E</b> | 0.001                       | 0.018                  |
| <b>R128E</b>             | 0.002                       | 0.016                  |
| <b>R132E</b>             | 0.563                       | 0.036                  |
| <b>Del169-L</b>          | 0.001                       | 0.015                  |
| <b>Del-182-L</b>         | 0.001                       | 0.015                  |
| <b>P190A+P191A</b>       | 0.014                       | 0.029                  |
| <b>A3A</b>               | 0.197                       | 0.180                  |
| <b>hA3A-Y130F</b>        | 0.200                       | 0.628                  |

**Supplementary Table 2. Summary of HiSeq X Ten sequencing.**

| Sample                                   | Sample Code | Group     | Mapped bases (Gbp) | Coverage |
|------------------------------------------|-------------|-----------|--------------------|----------|
| <b>BE3<sup>R126E</sup>-#1</b>            | A21         | tdTomato+ | 120.21             | 43.38    |
|                                          | A22         | tdTomato- | 118.12             | 42.63    |
| <b>BE3<sup>R126E</sup>-#2</b>            | A23         | tdTomato+ | 124.13             | 44.80    |
|                                          | A24         | tdTomato- | 121.36             | 43.80    |
| <b>BE3<sup>R126E</sup>-#3</b>            | A185        | tdTomato+ | 115.12             | 41.55    |
|                                          | A186        | tdTomato- | 117.56             | 42.43    |
| <b>BE3<sup>R126E</sup>-Tyr-C-#1</b>      | A29         | tdTomato+ | 141.77             | 51.16    |
|                                          | A30         | tdTomato- | 143.94             | 51.94    |
| <b>BE3<sup>R126E</sup>-Tyr-C-#2</b>      | A35         | tdTomato+ | 146.12             | 52.73    |
|                                          | A36         | tdTomato- | 143.13             | 51.65    |
| <b>BE3<sup>R126E</sup>-Tyr-C-#3</b>      | A225        | tdTomato+ | 141.81             | 51.18    |
|                                          | A226        | tdTomato- | 136.56             | 49.28    |
| <b>BE3<sup>R126E</sup>-Tyr-C-#4</b>      | A227        | tdTomato+ | 134.54             | 48.55    |
|                                          | A228        | tdTomato- | 130.00             | 46.92    |
| <b>BE3<sup>R126E</sup>-Tyr-D-#1</b>      | A123        | tdTomato+ | 113.09             | 40.81    |
|                                          | A124        | tdTomato- | 109.02             | 39.34    |
| <b>BE3<sup>R126E</sup>-Tyr-D-#2</b>      | A131        | tdTomato+ | 107.61             | 38.83    |
|                                          | A132        | tdTomato- | 127.93             | 46.17    |
| <b>BE3<sup>R126E</sup>-Tyr-D-#3</b>      | A141        | tdTomato+ | 118.05             | 42.60    |
|                                          | A142        | tdTomato- | 119.45             | 43.11    |
| <b>BE3<sup>R126E</sup>-Tyr-F-#1</b>      | A251        | tdTomato+ | 146.49             | 52.87    |
|                                          | A252        | tdTomato- | 129.56             | 46.76    |
| <b>BE3<sup>R126E</sup>-Tyr-F-#2</b>      | A258        | tdTomato+ | 142.19             | 51.31    |
|                                          | A259        | tdTomato- | 114.74             | 41.41    |
| <b>BE3<sup>W90Y+R126E</sup>-Tyr-C-#1</b> | A267        | tdTomato+ | 119.09             | 42.98    |
|                                          | A268        | tdTomato- | 142.76             | 51.52    |
| <b>BE3<sup>W90Y+R126E</sup>-Tyr-C-#2</b> | A269        | tdTomato+ | 142.76             | 51.52    |
|                                          | A270        | tdTomato- | 122.23             | 44.11    |
| <b>BE3<sup>W90Y+R126E</sup>-Tyr-C-#3</b> | A271        | tdTomato+ | 116.99             | 42.22    |
|                                          | A272        | tdTomato- | 137.70             | 49.69    |
| <b>BE3<sup>W90Y+R126E</sup>-Tyr-C-#4</b> | A273        | tdTomato+ | 126.17             | 45.53    |
|                                          | A274        | tdTomato- | 148.42             | 53.56    |
| <b>BE3<sup>W90Y+R126E</sup>-Tyr-C-#5</b> | A275        | tdTomato+ | 130.04             | 46.93    |
|                                          | A276        | tdTomato- | 146.61             | 52.91    |



|                                          |      |           |        |       |
|------------------------------------------|------|-----------|--------|-------|
| <b>BE3<sup>W90Y+R126E</sup>-Tyr-C-#1</b> | A301 | tdTomato+ | 130.76 | 47.19 |
|                                          | A302 | tdTomato- | 135.93 | 49.05 |
| <b>BE3<sup>W90Y+R126E</sup>-Tyr-C-#2</b> | A303 | tdTomato+ | 143.04 | 51.62 |
|                                          | A304 | tdTomato- | 149.73 | 54.04 |
| <b>BE3<sup>W90F+R126E</sup>-Tyr-C-#1</b> | A307 | tdTomato+ | 147.88 | 53.37 |
|                                          | A308 | tdTomato- | 117.40 | 42.37 |
| <b>BE3<sup>W90F+R126E</sup>-Tyr-C-#2</b> | A309 | tdTomato+ | 83.88  | 30.27 |
|                                          | A310 | tdTomato- | 126.48 | 45.64 |
| <b>BE3-hA3A<sup>Y130F</sup>-Tyr-C-#1</b> | A277 | tdTomato+ | 137.38 | 49.58 |
|                                          | A278 | tdTomato- | 152.07 | 54.88 |
| <b>BE3-hA3A<sup>Y130F</sup>-Tyr-C-#2</b> | A281 | tdTomato+ | 147.01 | 53.05 |
|                                          | A282 | tdTomato- | 149.36 | 53.90 |
| <b>BE3-hA3A<sup>Y130F</sup>-Tyr-C-#3</b> | A283 | tdTomato+ | 149.70 | 54.02 |
|                                          | A284 | tdTomato- | 151.43 | 54.65 |

---

**Supplementary Table 4. Primers used for deep sequencing of on-target activity.**

| <b>On-target site</b>  | <b>On-target sequence</b> | <b>Primer 1</b>       | <b>Primer 2</b>        |
|------------------------|---------------------------|-----------------------|------------------------|
| <b>EMX1 site 1</b>     | TGCCCCTCCCTCCCTGGCCCAGG   | CCAGCTTCTGCCGTTTGTACT | AACTCGTAGAGTCCCATGTCTG |
| <b>DNMT3B site 2</b>   | AGAGCCCCCCTCAAAGAGAGGG    | GATGGCTGTTTGTCTTGTGGC | TATAAACCCCTGTGTGCTGCTT |
| <b>EMX1 site 2</b>     | GAGTCCGAGCAGAAGAAGAAGGG   | GTTCCAGAACCGGAGGACAA  | ATTGCTTGTCCCTCTGTCA    |
| <b>FANCF site 1</b>    | GGAATCCCTTCTGCAGCACCTGG   | TCCAGGTGCTGACGTAGGTA  | ATCATCTCGCACGTGGTTC    |
| <b>HEK293 site 1</b>   | GAACACAAAGCATAGACTGCGGG   | GCTAACTGTGACAGCATGTGG | CACCAACTTACACACAGTGA   |
| <b>HEK293 site 2</b>   | GGCCAGACTGAGCACGTGATGG    | TTCTGCTTCTCCAGCCCTGGC | TTCATGCAGGTGCTGAAAGCCA |
| <b>HEK293 site 3</b>   | GGCACTGCGGCTGGAGGTGGGGG   | CAGAGGGTCCAAAGCAGGAT  | TCAACCCGAACGGAGACAC    |
| <b>RNF2 site 1</b>     | GTCATCTTAGTCATTACCTGAGG   | CGGAACTCAACCATTAAGCA  | GTTGCCTTCAAACCTGCTC    |
| <b>EMX1 site 3</b>     | GTATTCACCTGAAAGTGTGCAGG   | CTTGACTGATATCTCCAGGC  | TAGGGGAAGTTGGAGGAGGGAC |
| <b>PPP1R12C site 1</b> | GGCACTCGGGGGCGAGAGGAGGG   | GCTCAAAGTGGTCCGGACTC  | TTACCATCCCTCCCTCGACT   |

**Supplementary Table 5. Primers used for deep sequencing of off-target effects.**

| <b>Site</b>                      | <b>On-target sequence</b> | <b>Primer 1</b>       | <b>Primer 2</b>      |
|----------------------------------|---------------------------|-----------------------|----------------------|
| <b>EMX1 site 2-On-target</b>     | GAGTCCGAGCAGAAGAAGAAGGG   |                       |                      |
| <b>EMX1 site 2-Off-target-1</b>  | GAGTTAGAGCAGAAGAAGAAAGG   | TTTCTGAGGGCTGCTACCTG  | GCCCCTCTAATACAATGGG  |
| <b>EMX1 site 2-Off-target-2</b>  | GAGTCTAAGCAGAAGAAGAAGAG   | CTCAATGTGCTTCAACCCATC | ACAGAGCGAGACTCCGTCT  |
| <b>EMX1 site 2-Off-target-3</b>  | GAGTCCTAGCAGGAGAAGAAGAG   | CAGACTCAGTAAAGCCTGGA  | TAGGCTGGAGTGCAGTGGTG |
| <b>EMX1 site 2-Off-target-4</b>  | GAGTCCGGGAAGGAGAAGAAAGG   | TCTGCCTCTGACGACGAGCAA | GAGAAAGGCAAACAGGAGG  |
| <b>EMX1 site 2-Off-target-5</b>  | AAGTCCGAGGAGAGGAAGAAAGG   | TTCATGGAGGGGCACAGAAG  | GCCCTTCCAACTAGAAGTT  |
| <b>EMX1 site 2-Off-target-6</b>  | GAATCCAAGCAGGAGAAGAAGGA   | GAAACCGAATTATGGATGGG  | CTCTTAGAAATGGCATTGGG |
| <b>EMX1 site 2-Off-target-7</b>  | ACGTCTGAGCAGAAGAAGAATGG   | TCGTCTTCCTGCAGAGGTTT  | ACTCCCATCTTCCTCCCTA  |
| <b>FANCF site 1-On-target</b>    | GGAATCCCTTCTGCAGCACCTGG   |                       |                      |
| <b>FANCF site 1-Off-target-1</b> | GGAACCCCGTCTGCAGCACCAGG   | GTCTTAGTCGCCTTAGCACT  | ATGTGCTCTGATTTCCGTG  |
| <b>FANCF site 1-Off-target-2</b> | GGAGTCCCTCCTACAGCACCAGG   | CATCCCGAACACAGTGACAG  | AGATGGAAGAATGAGCAGG  |
| <b>FANCF site 1-Off-target-3</b> | AGAGGCCCTCTGCAGCACCAGG    | AGGACTCAGGCAGGAGTTAG  | TGCGGGGTGTGGATGATTT  |
| <b>FANCF site 1-Off-target-4</b> | ACCATCCCTCCTGCAGCACCAGG   | TAGAGTGGCATGCAACCTAG  | AATGTGCTGGGTCTCTCCT  |
| <b>FANCF site 1-Off-target-5</b> | TGAATCCCATCTCCAGCACCAGG   | CAGAAACACTGGAGACCCTC  | GATGAAGAACTGAGGCACA  |
| <b>FANCF site 1-Off-target-6</b> | GGAGTCCCTCCTACAGCACCAGG   | CCGAACACAGTGACAGAAGG  | GCCCAGTGAGACCAGTTTG  |

---

|                                   |                         |                       |                          |
|-----------------------------------|-------------------------|-----------------------|--------------------------|
| <b>FANCF site 1-Off-target-7</b>  | GGAGTCCCTCCTGCAGCACCTGA | GGAAAATTGCTTGTTCGCAGC | CCCCTCTGACGGTAATAAT      |
| <b>HEK293 site 1-On-target</b>    | GAACACAAAGCATAGACTGCGGG |                       |                          |
| <b>HEK293 site 1-Off-target-1</b> | GAACACAATGCATAGATTGCCGG | CATATTTAATGCTCCCACACC | AGCCACATTGTAGACAATGAAGCC |
| <b>HEK293 site 1-Off-target-2</b> | AAACATAAAGCATAGACTGCAAA | CAGAATAGTGGGACTATGCC  | TCACCCTCCTCCTCTCACT      |
| <b>HEK293 site 1-Off-target-3</b> | TCAGGGTGAGCATAGACTGCCGG | AGATAGGACAGGTGAGGCCT  | GGCAGGGATGAAAGGTGTC      |
| <b>HEK293 site 1-Off-target-4</b> | TGAAGTGTTGCATAGACTGCAGG | ACCCCTCATGCAAATCCTAAC | TGGGTGGCTAGACTCAGAG      |
| <b>HEK293 site 1-Off-target-5</b> | GGAGAGAGAGCATAGACTGCTGG | TCTGTACCTGCTGGGCATCCA | GAACATCACTCCCATCACG      |
| <b>HEK293 site 1-Off-target-6</b> | CCAAACAAAACATAGACTGCTGG | GGGTAAGACTCTACCCAGGA  | TTAATAGCAGTGTGGTGGG      |
| <b>HEK293 site 2-On-target</b>    | GGCCCAGACTGAGCACGTGATGG |                       |                          |
| <b>HEK293 site 2-Off-target-1</b> | CACCCAGACTGAGCACGTGCTGG | GACAAGAGCATTAAGTGCACC | CTCTTCTTCCGAGTGGTGG      |
| <b>HEK293 site 2-Off-target-2</b> | GACACAGACTGGGCACGTGAGGG | GTGGAGTCAGCCTCGATTAC  | GATTAGGGTTGCCAAGAGA      |
| <b>HEK293 site 2-Off-target-3</b> | AGCTCAGACTGAGCAAGTGAGGG | TTCAGTCCAGACATCAGCCA  | GGCGATGAGTAAGAGTGATGTG   |
| <b>HEK293 site 2-Off-target-4</b> | AGACCAGACTGAGCAAGAGAGGG | actttggaaggtcgaagcgga | TGCATGGTTCATCTCCCCTA     |
| <b>HEK293 site 2-Off-target-5</b> | GAGCCAGAATGAGCACGTGAGGG | GGAAAATTGCGAGCAGAGGCT | CTGGGGTCTCTTTCTGCCTC     |
| <b>HEK293 site 2-Off-target-6</b> | CAGGAAGCTGGAGCACGTGAGGG | CATCCCTTGTCTCTCTTAGG  | TACACGTTCCACCCCTCCAACC   |
| <b>HEK293 site 2-Off-target-7</b> | AAGGCTGAGGGAGCACGTGAAGG | AGTACAAGCTGATTACATCC  | GGTGGAGACAGAAAATGAGG     |
| <b>HEK293 site 2-Off-target-8</b> | GTCAGGGGAAGAGCACGTGACGG | ACTGCAGCCTGGCCCTAAAC  | CTACCTCCAAGCCACCAAAC     |

---

---

|                                    |                         |                        |                       |
|------------------------------------|-------------------------|------------------------|-----------------------|
| <b>HEK293 site 2-Off-target-9</b>  | GTTGTGAACTGAGCACGTGAGGG | CATTTCTGTCAGATCACGG    | TCAAATGCTCCACCCGCCTCA |
| <b>HEK293 site 2-Off-target-10</b> | ATATTTGCTGGAGCACGTGAAGG | TCTGAAGCTATGCGCTGGAG   | TCAGAACCCCAATACCCCTC  |
| <b>HEK293 site 3-On-target</b>     | GGCACTGCGGCTGGAGGTGGGGG |                        |                       |
| <b>HEK293 site 3-Off-target-1</b>  | TGCACTGCGGCCGGAGGAGGTGG | TGGGCTCACTGCTCTCCAGAGT | AGGAAGGGTACTGGGGAGT   |
| <b>HEK293 site 3-Off-target-2</b>  | GGCTCTGCGGCTGGAGGGGGTGG | CAAGTGCTCCCAATCCTGA    | TGGTGAAGAGGATGGGGTGA  |
| <b>HEK293 site 3-Off-target-4</b>  | GGCACTGCTACTGGGGGTGGTGG | CCGTTGCTTGTCAGCATCCT   | ACTGCTCCCTCTGTTCTCAT  |
| <b>HEK293 site 3-Off-target-6</b>  | GGCACTGGGGTTGGAGGTGGGGG | CCATGGCAAACCTCTCCACCA  | GTCATTTTCAGTGGCAGCGGA |

---

## References

1. Zuo, E. et al. Cytosine base editor generates substantial off-target single nucleotide variants in mouse embryos. *Science*, published online (2019).
2. Cibulskis, K. et al. Sensitive detection of somatic point mutations in impure and heterogeneous cancer samples. *Nat Biotechnol* **31**, 213-219 (2013).
3. Wilm, A. et al. LoFreq: a sequence-quality aware, ultra-sensitive variant caller for uncovering cell-population heterogeneity from high-throughput sequencing datasets. *Nucleic Acids Res* **40**, 11189-11201 (2012).
4. Saunders, C.T. et al. Strelka: accurate somatic small-variant calling from sequenced tumor-normal sample pairs. *Bioinformatics* **28**, 1811-1817 (2012).
5. Fang, H. et al. Indel variant analysis of short-read sequencing data with Scalpel. *Nat Protoc* **11**, 2529-2548 (2016).
6. Bae, S., Park, J. & Kim, J.S. Cas-OFFinder: a fast and versatile algorithm that searches for potential off-target sites of Cas9 RNA-guided endonucleases. *Bioinformatics* **30**, 1473-1475 (2014).
7. Haeussler, M. et al. Evaluation of off-target and on-target scoring algorithms and integration into the guide RNA selection tool CRISPOR. *Genome Biol* **17**, 148 (2016).
8. Wang, K., Li, M. & Hakonarson, H. ANNOVAR: functional annotation of genetic variants from high-throughput sequencing data. *Nucleic Acids Res* **38**, e164 (2010).
9. Chen, C.C., Hwang, J.K. & Yang, J.M. (PS)2: protein structure prediction server. *Nucleic Acids Res* **34**, W152-157 (2006).
10. Huang, T.T. et al. (PS)2: protein structure prediction server version 3.0. *Nucleic Acids Res* **43**, W338-342 (2015).
11. Tsai, S.Q. et al. GUIDE-seq enables genome-wide profiling of off-target cleavage by CRISPR-Cas nucleases. *Nat Biotechnol* **33**, 187-197 (2015).
12. Komor, A.C., Kim, Y.B., Packer, M.S., Zuris, J.A. & Liu, D.R. Programmable editing of a target base in genomic DNA without double-stranded DNA cleavage. *Nature* **533**, 420-424 (2016).
13. Mali, P. et al. CAS9 transcriptional activators for target specificity screening and paired nickases for cooperative genome engineering. *Nat Biotechnol* **31**, 833-838 (2013).
